# Supplementary material for: Noble Gas—Silicon Cations: Theoretical Insights into the Nature of the Bond
Source: MDPI journal article supplement (doi:10.3390/molecules27144592), 2022-07-19
Supplement: s1 [file s1]

# **Noble Gas – Silicon Cations: Theoretical Insights into the Nature of the Bond**

Stefano Borocci,<sup>a,b</sup> Felice Grandinetti,<sup>\*,a,b</sup> and Nico Sanna<sup>a,c</sup>

to be published in *Molecules*

---

<sup>[a]</sup> *Prof. S. Borocci, Prof. F. Grandinetti, Prof. N. Sanna*

*Dipartimento per la Innovazione nei sistemi Biologici, Agroalimentari e Forestali (DIBAF), Università della Tuscia, L.go dell'Università, s.n.c., 01100 Viterbo (Italy)*

*E-mail: fgrandi@unitus.it*

*orcid.org/0000-0001-7217-9490*

<sup>[b]</sup> *Prof. S. Borocci, Prof. F. Grandinetti*

*Istituto per i Sistemi Biologici del CNR, Via Salaria, Km 29.500, 00015, Monterotondo, RM (Italy)*

<sup>[c]</sup> *Prof. N. Sanna*

*Istituto per la Scienza e Tecnologia dei Plasmi (ISTP) del CNR, Via Amendola, 122/D, 70126 Bari (Italy)*

**Supplementary Information**

**Data S1. MP2/aug-cc-pVTZ optimized cartesian coordinates (Å) of the Ng-Si cations.**

**HeSiH<sub>3</sub><sup>+</sup>**

|    |             |             |            |
|----|-------------|-------------|------------|
| He | 0.00000000  | 0.00000000  | 0.00000000 |
| Si | 0.00000000  | 0.00000000  | 2.12924015 |
| H  | 1.46007416  | 0.00000000  | 2.15762808 |
| H  | -0.73003708 | 1.26446131  | 2.15762808 |
| H  | -0.73003708 | -1.26446131 | 2.15762808 |

**NeSiH<sub>3</sub><sup>+</sup>**

|    |             |             |            |
|----|-------------|-------------|------------|
| Ne | 0.00000000  | 0.00000000  | 0.00000000 |
| Si | 0.00000000  | 0.00000000  | 2.32988195 |
| H  | 1.45960979  | 0.00000000  | 2.37075790 |
| H  | -0.72980489 | 1.26405916  | 2.37075790 |
| H  | -0.72980489 | -1.26405916 | 2.37075790 |

**ArSiH<sub>3</sub><sup>+</sup>**

|    |             |             |            |
|----|-------------|-------------|------------|
| Ar | 0.00000000  | 0.00000000  | 0.00000000 |
| Si | 0.00000000  | 0.00000000  | 2.40634108 |
| H  | 1.45406685  | 0.00000000  | 2.53958491 |
| H  | -0.72703342 | 1.25925883  | 2.53958491 |
| H  | -0.72703342 | -1.25925883 | 2.53958491 |

**KrSiH<sub>3</sub><sup>+</sup>**

|    |             |             |            |
|----|-------------|-------------|------------|
| Kr | 0.00000000  | 0.00000000  | 0.00000000 |
| Si | 0.00000000  | 0.00000000  | 2.51405822 |
| H  | 1.45171616  | 0.00000000  | 2.67791856 |
| H  | -0.72585808 | 1.25722307  | 2.67791856 |
| H  | -0.72585808 | -1.25722307 | 2.67791856 |

**XeSiH<sub>3</sub><sup>+</sup>**

|    |             |             |            |
|----|-------------|-------------|------------|
| Xe | 0.00000000  | 0.00000000  | 0.00000000 |
| Si | 0.00000000  | 0.00000000  | 2.66440791 |
| H  | 1.44837808  | 0.00000000  | 2.86530110 |
| H  | -0.72418904 | 1.25433221  | 2.86530110 |
| H  | -0.72418904 | -1.25433221 | 2.86530110 |

**RnSiH<sub>3</sub><sup>+</sup>**

|    |             |             |            |
|----|-------------|-------------|------------|
| Rn | 0.00000000  | 0.00000000  | 0.00000000 |
| Si | 0.00000000  | 0.00000000  | 2.73640309 |
| H  | 1.44683491  | 0.00000000  | 2.95318289 |
| H  | -0.72341746 | 1.25299579  | 2.95318289 |
| H  | -0.72341746 | -1.25299579 | 2.95318289 |

**HeSiF<sub>3</sub><sup>+</sup>**

|    |             |             |            |
|----|-------------|-------------|------------|
| He | 0.00000000  | 0.00000000  | 0.00000000 |
| Si | 0.00000000  | 0.00000000  | 2.05986449 |
| F  | 1.53026480  | 0.00000000  | 2.11153304 |
| F  | -0.76513240 | 1.32524819  | 2.11153304 |
| F  | -0.76513240 | -1.32524819 | 2.11153304 |

**NeSiF<sub>3</sub><sup>+</sup>**

|    |             |             |            |
|----|-------------|-------------|------------|
| Ne | 0.00000000  | 0.00000000  | 0.00000000 |
| Si | 0.00000000  | 0.00000000  | 2.18824200 |
| F  | 1.53025327  | 0.00000000  | 2.27053443 |
| F  | -0.76512663 | 1.32523820  | 2.27053443 |
| F  | -0.76512663 | -1.32523820 | 2.27053443 |

**ArSiF<sub>3</sub><sup>+</sup>**

|    |             |             |            |
|----|-------------|-------------|------------|
| Ar | 0.00000000  | 0.00000000  | 0.00000000 |
| Si | 0.00000000  | 0.00000000  | 2.29713447 |
| F  | 1.52486472  | 0.00000000  | 2.51697995 |
| F  | -0.76243236 | 1.32057159  | 2.51697995 |
| F  | -0.76243236 | -1.32057159 | 2.51697995 |

**KrSiF<sub>3</sub><sup>+</sup>**

|    |             |             |            |
|----|-------------|-------------|------------|
| Kr | 0.00000000  | 0.00000000  | 0.00000000 |
| Si | 0.00000000  | 0.00000000  | 2.41538228 |
| F  | 1.52207916  | 0.00000000  | 2.67626544 |
| F  | -0.76103958 | 1.31815922  | 2.67626544 |
| F  | -0.76103958 | -1.31815922 | 2.67626544 |

**XeSiF<sub>3</sub><sup>+</sup>**

|    |             |             |            |
|----|-------------|-------------|------------|
| Xe | 0.00000000  | 0.00000000  | 0.00000000 |
| Si | 0.00000000  | 0.00000000  | 2.57601399 |
| F  | 1.51810503  | 0.00000000  | 2.88551776 |
| F  | -0.75905252 | 1.31471752  | 2.88551776 |
| F  | -0.75905252 | -1.31471752 | 2.88551776 |

**RnSiF<sub>3</sub><sup>+</sup>**

|    |             |             |            |
|----|-------------|-------------|------------|
| Rn | 0.00000000  | 0.00000000  | 0.00000000 |
| Si | 0.00000000  | 0.00000000  | 2.65219476 |
| F  | 1.51640125  | 0.00000000  | 2.98247877 |
| F  | -0.75820063 | 1.31324201  | 2.98247877 |
| F  | -0.75820063 | -1.31324201 | 2.98247877 |

**HeSiCl<sub>3</sub><sup>+</sup>**

|    |             |             |            |
|----|-------------|-------------|------------|
| He | 0.00000000  | 0.00000000  | 0.00000000 |
| Si | 0.00000000  | 0.00000000  | 2.98596866 |
| Cl | 1.95711262  | 0.00000000  | 2.99117047 |
| Cl | -0.97855631 | 1.69490925  | 2.99117047 |
| Cl | -0.97855631 | -1.69490925 | 2.99117047 |

**NeSiCl<sub>3</sub><sup>+</sup>**

|    |             |             |            |
|----|-------------|-------------|------------|
| Ne | 0.00000000  | 0.00000000  | 0.00000000 |
| Si | 0.00000000  | 0.00000000  | 2.91554061 |
| Cl | 1.95729197  | 0.00000000  | 2.93207681 |
| Cl | -0.97864598 | 1.69506457  | 2.93207681 |
| Cl | -0.97864598 | -1.69506457 | 2.93207681 |

**ArSiCl<sub>3</sub><sup>+</sup>**

|    |             |             |            |
|----|-------------|-------------|------------|
| Ar | 0.00000000  | 0.00000000  | 0.00000000 |
| Si | 0.00000000  | 0.00000000  | 2.69040654 |
| Cl | 1.95786108  | 0.00000000  | 2.84789956 |
| Cl | -0.97893054 | 1.69555743  | 2.84789956 |
| Cl | -0.97893054 | -1.69555743 | 2.84789956 |

**KrSiCl<sub>3</sub><sup>+</sup>**

|    |             |             |            |
|----|-------------|-------------|------------|
| Kr | 0.00000000  | 0.00000000  | 0.00000000 |
| Si | 0.00000000  | 0.00000000  | 2.66961586 |
| Cl | 1.95551282  | 0.00000000  | 2.91811496 |
| Cl | -0.97775641 | 1.69352378  | 2.91811496 |
| Cl | -0.97775641 | -1.69352378 | 2.91811496 |

**XeSiCl<sub>3</sub><sup>+</sup>**

|    |             |             |            |
|----|-------------|-------------|------------|
| Xe | 0.00000000  | 0.00000000  | 0.00000000 |
| Si | 0.00000000  | 0.00000000  | 2.74597389 |
| Cl | 1.95127808  | 0.00000000  | 3.08320187 |
| Cl | -0.97563904 | 1.68985638  | 3.08320187 |
| Cl | -0.97563904 | -1.68985638 | 3.08320187 |

**RnSiCl<sub>3</sub><sup>+</sup>**

|    |             |             |            |
|----|-------------|-------------|------------|
| Rn | 0.00000000  | 0.00000000  | 0.00000000 |
| Si | 0.00000000  | 0.00000000  | 2.79282755 |
| Cl | 1.94940089  | 0.00000000  | 3.16481097 |
| Cl | -0.97470044 | 1.68823069  | 3.16481097 |
| Cl | -0.97470044 | -1.68823069 | 3.16481097 |

**Ar<sub>2</sub>SiH<sub>3</sub><sup>+</sup>**

|    |             |             |            |
|----|-------------|-------------|------------|
| H  | 0.00000000  | 0.00000000  | 0.00000000 |
| Si | 0.00000000  | 0.00000000  | 1.45830103 |
| Ar | 2.56984552  | 0.00000000  | 1.45830103 |
| Ar | -2.56984552 | 0.00000000  | 1.45830103 |
| H  | 0.00000000  | 1.26292574  | 2.18745155 |
| H  | 0.00000000  | -1.26292574 | 2.18745155 |

**Ar<sub>2</sub>SiF<sub>3</sub><sup>+</sup>**

|    |             |             |            |
|----|-------------|-------------|------------|
| F  | 0.00000000  | 0.00000000  | 0.00000000 |
| Si | 0.00000000  | 0.00000000  | 1.54439554 |
| Ar | 2.49103590  | 0.00000000  | 1.54439554 |
| Ar | -2.49103590 | 0.00000000  | 1.54439554 |
| F  | 0.00000000  | 1.33748577  | 2.31659331 |
| F  | 0.00000000  | -1.33748577 | 2.31659331 |

**Ar<sub>2</sub>SiCl<sub>3</sub><sup>+</sup>**

|    |             |             |            |
|----|-------------|-------------|------------|
| Cl | 0.00000000  | 0.00000000  | 0.00000000 |
| Si | 0.00000000  | 0.00000000  | 1.96315153 |
| Ar | 2.96064596  | 0.00000000  | 1.96315153 |
| Ar | -2.96064596 | 0.00000000  | 1.96315153 |
| Cl | 0.00000000  | 1.70013910  | 2.94472730 |
| Cl | 0.00000000  | -1.70013910 | 2.94472730 |

**HeSiF<sub>2</sub><sup>2+</sup>**

|    |             |            |            |
|----|-------------|------------|------------|
| He | 0.00000000  | 0.00000000 | 0.00000000 |
| Si | 0.00000000  | 0.00000000 | 1.72079363 |
| F  | 1.48502704  | 0.00000000 | 1.97266001 |
| F  | -1.48502704 | 0.00000000 | 1.97266001 |

**NeSiF<sub>2</sub><sup>2+</sup>**

|    |             |            |            |
|----|-------------|------------|------------|
| Ne | 0.00000000  | 0.00000000 | 0.00000000 |
| Si | 0.00000000  | 0.00000000 | 1.88787057 |
| F  | 1.47278802  | 0.00000000 | 2.21105249 |
| F  | -1.47278802 | 0.00000000 | 2.21105249 |

**ArSiF<sub>2</sub><sup>2+</sup>**

|    |             |            |            |
|----|-------------|------------|------------|
| Ar | 0.00000000  | 0.00000000 | 0.00000000 |
| Si | 0.00000000  | 0.00000000 | 2.11152821 |
| F  | 1.42239965  | 0.00000000 | 2.62970922 |
| F  | -1.42239965 | 0.00000000 | 2.62970922 |

**KrSiF<sub>2</sub><sup>2+</sup>**

|    |             |            |            |
|----|-------------|------------|------------|
| Kr | 0.00000000  | 0.00000000 | 0.00000000 |
| Si | 0.00000000  | 0.00000000 | 2.24666591 |
| F  | 1.40348131  | 0.00000000 | 2.82355207 |
| F  | -1.40348131 | 0.00000000 | 2.82355207 |

**XeSiF<sub>2</sub><sup>2+</sup>**

|    |             |            |            |
|----|-------------|------------|------------|
| Xe | 0.00000000  | 0.00000000 | 0.00000000 |
| Si | 0.00000000  | 0.00000000 | 2.42804609 |
| F  | 1.38125931  | 0.00000000 | 3.06918659 |
| F  | -1.38125931 | 0.00000000 | 3.06918659 |

**RnSiF<sub>2</sub><sup>2+</sup>**

|    |             |            |            |
|----|-------------|------------|------------|
| Rn | 0.00000000  | 0.00000000 | 0.00000000 |
| Si | 0.00000000  | 0.00000000 | 2.51774213 |
| F  | 1.37171708  | 0.00000000 | 3.18580290 |
| F  | -1.37171708 | 0.00000000 | 3.18580290 |

**FKrSiF<sub>2</sub><sup>+</sup>**

|    |             |            |             |
|----|-------------|------------|-------------|
| Kr | 0.00000000  | 0.00000000 | 0.00000000  |
| Si | 0.00000000  | 0.00000000 | 2.47668318  |
| F  | 1.31084818  | 0.00000000 | 3.30975101  |
| F  | -1.31084818 | 0.00000000 | 3.30975101  |
| F  | 0.00000000  | 0.00000000 | -1.92648414 |

**FXeSiF<sub>2</sub><sup>+</sup>**

|    |             |            |             |
|----|-------------|------------|-------------|
| Xe | 0.00000000  | 0.00000000 | 0.00000000  |
| Si | 0.00000000  | 0.00000000 | 2.63044819  |
| F  | 1.29886176  | 0.00000000 | 3.48814902  |
| F  | -1.29886176 | 0.00000000 | 3.48814902  |
| F  | 0.00000000  | 0.00000000 | -1.98253314 |

**FRnSiF<sub>2</sub><sup>+</sup>**

|    |             |            |             |
|----|-------------|------------|-------------|
| Rn | 0.00000000  | 0.00000000 | 0.00000000  |
| Si | 0.00000000  | 0.00000000 | 2.73457920  |
| F  | 1.29349491  | 0.00000000 | 3.60456496  |
| F  | -1.29349491 | 0.00000000 | 3.60456496  |
| F  | 0.00000000  | 0.00000000 | -2.05362115 |

**Table S1.** MP2/aug-cc-pVTZ cartesian coordinates (Å) and AIM indices of the BCP located on the Ng-Si bonds of the Ng-Si cations. The origin is at Ng except for Ar<sub>2</sub>SiX<sub>3</sub><sup>+</sup> (origin at X).

|                                                | Bond  | X      | Y   | Z       | $\rho^a$ | $\nabla^2(\rho)^b$ | $H^c$    |
|------------------------------------------------|-------|--------|-----|---------|----------|--------------------|----------|
| HeSiH <sub>3</sub> <sup>+</sup>                | He-Si | 0.0    | 0.0 | 1.0826  | 0.0163   | 0.0581             | -0.0003  |
| NeSiH <sub>3</sub> <sup>+</sup>                | Ne-Si | 0.0    | 0.0 | 1.2907  | 0.0176   | 0.0553             | -0.0017  |
| ArSiH <sub>3</sub> <sup>+</sup>                | Ar-Si | 0.0    | 0.0 | 1.5272  | 0.0359   | 0.0792             | -0.0109  |
| KrSiH <sub>3</sub> <sup>+</sup>                | Kr-Si | 0.0    | 0.0 | 1.6368  | 0.0402   | 0.0569             | -0.0156  |
| XeSiH <sub>3</sub> <sup>+</sup>                | Xe-Si | 0.0    | 0.0 | 1.7716  | 0.0447   | 0.0153             | -0.0214  |
| RnSiH <sub>3</sub> <sup>+</sup>                | Rn-Si | 0.0    | 0.0 | 1.8204  | 0.0460   | -0.0092            | -0.0233  |
| HeSiF <sub>3</sub> <sup>+</sup>                | He-Si | 0.0    | 0.0 | 1.0809  | 0.0183   | 0.0651             | -0.0007  |
| NeSiF <sub>3</sub> <sup>+</sup>                | Ne-Si | 0.0    | 0.0 | 1.25995 | 0.0230   | 0.0790             | -0.0028  |
| ArSiF <sub>3</sub> <sup>+</sup>                | Ar-Si | 0.0    | 0.0 | 1.4773  | 0.0466   | 0.1237             | -0.0157  |
| KrSiF <sub>3</sub> <sup>+</sup>                | Kr-Si | 0.0    | 0.0 | 1.5916  | 0.0516   | 0.0791             | -0.0232  |
| XeSiF <sub>3</sub> <sup>+</sup>                | Xe-Si | 0.0    | 0.0 | 1.7361  | 0.0571   | 0.0093             | -0.0326  |
| RnSiF <sub>3</sub> <sup>+</sup>                | Rn-Si | 0.0    | 0.0 | 1.7920  | 0.0589   | -0.0320            | -0.0362  |
| HeSiCl <sub>3</sub> <sup>+</sup>               | He-Si | 0.0    | 0.0 | 1.29325 | 0.0036   | 0.0153             | 0.00096  |
| NeSiCl <sub>3</sub> <sup>+</sup>               | Ne-Si | 0.0    | 0.0 | 1.4241  | 0.0071   | 0.0239             | 0.0005   |
| ArSiCl <sub>3</sub> <sup>+</sup>               | Ar-Si | 0.0    | 0.0 | 1.5917  | 0.0238   | 0.0293             | -0.0047  |
| KrSiCl <sub>3</sub> <sup>+</sup>               | Kr-Si | 0.0    | 0.0 | 1.6748  | 0.0337   | 0.0119             | -0.0122  |
| XeSiCl <sub>3</sub> <sup>+</sup>               | Xe-Si | 0.0    | 0.0 | 1.7733  | 0.0430   | -0.0187            | -0.0200  |
| RnSiCl <sub>3</sub> <sup>+</sup>               | Rn-Si | 0.0    | 0.0 | 1.7917  | 0.0464   | -0.0348            | -0.0220  |
| Ar <sub>2</sub> SiH <sub>3</sub> <sup>+</sup>  | Ar-Si | 0.9922 | 0.0 | 1.4583  | 0.0265   | 0.0449             | -0.0064  |
| Ar <sub>2</sub> SiF <sub>3</sub> <sup>+</sup>  | Ar-Si | 0.9175 | 0.0 | 1.5444  | 0.0314   | 0.0512             | -0.0102  |
| Ar <sub>2</sub> SiCl <sub>3</sub> <sup>+</sup> | Ar-Si | 1.3022 | 0.0 | 1.9632  | 0.0144   | 0.0291             | -0.00056 |
| HeSiF <sub>2</sub> <sup>2+</sup>               | He-Si | 0.0    | 0.0 | 0.9290  | 0.0431   | 0.2378             | -0.0024  |
| NeSiF <sub>2</sub> <sup>2+</sup>               | Ne-Si | 0.0    | 0.0 | 1.1094  | 0.0500   | 0.2926             | -0.0023  |
| ArSiF <sub>2</sub> <sup>2+</sup>               | Ar-Si | 0.0    | 0.0 | 1.3569  | 0.0784   | 0.2228             | -0.0362  |
| KrSiF <sub>2</sub> <sup>2+</sup>               | Kr-Si | 0.0    | 0.0 | 1.4773  | 0.0821   | 0.1102             | -0.0476  |
| XeSiF <sub>2</sub> <sup>2+</sup>               | Xe-Si | 0.0    | 0.0 | 1.6259  | 0.0851   | -0.0325            | -0.0588  |
| RnSiF <sub>2</sub> <sup>2+</sup>               | Rn-Si | 0.0    | 0.0 | 1.6649  | 0.0848   | -0.1190            | -0.0607  |
| FKrSiF <sub>2</sub> <sup>+</sup>               | Kr-F  | 0.0    | 0.0 | -1.0141 | 0.1300   | 0.2526             | -0.0552  |
|                                                | Kr-Si | 0.0    | 0.0 | 1.3361  | 0.0754   | -0.0297            | -0.0297  |
| FXeSiF <sub>2</sub> <sup>+</sup>               | Xe-F  | 0.0    | 0.0 | -1.0223 | 0.1290   | 0.2395             | -0.0680  |
|                                                | Xe-Si | 0.0    | 0.0 | 1.3720  | 0.0716   | -0.0143            | -0.0255  |
| FRnSiF <sub>2</sub> <sup>+</sup>               | Rn-F  | 0.0    | 0.0 | -1.0904 | 0.1190   | 0.3299             | -0.04995 |
|                                                | Rn-Si | 0.0    | 0.0 | 1.4001  | 0.0633   | 0.0096             | -0.0204  |

<sup>a</sup> Electron density ( $e a_0^{-3}$ ). <sup>b</sup> Laplacian of the electron density ( $e a_0^{-5}$ ). <sup>c</sup> Energy density ( $hartree a_0^{-3}$ ).

**Table S2.** CCSD/aug-cc-pVTZ T1 diagnostics of the Ng-Si cations.

|                                  | T1     |                                                | T1     |
|----------------------------------|--------|------------------------------------------------|--------|
| HeSiH <sub>3</sub> <sup>+</sup>  | 0.0079 | KrSiCl <sub>3</sub> <sup>+</sup>               | 0.0099 |
| NeSiH <sub>3</sub> <sup>+</sup>  | 0.0089 | XeSiCl <sub>3</sub> <sup>+</sup>               | 0.0100 |
| ArSiH <sub>3</sub> <sup>+</sup>  | 0.0074 | RnSiCl <sub>3</sub> <sup>+</sup>               | 0.0103 |
| KrSiH <sub>3</sub> <sup>+</sup>  | 0.0082 | Ar <sub>2</sub> SiH <sub>3</sub> <sup>+</sup>  | 0.0067 |
| XeSiH <sub>3</sub> <sup>+</sup>  | 0.0094 | Ar <sub>2</sub> SiF <sub>3</sub> <sup>+</sup>  | 0.0108 |
| RnSiH <sub>3</sub> <sup>+</sup>  | 0.0105 | Ar <sub>2</sub> SiCl <sub>3</sub> <sup>+</sup> | 0.0092 |
| HeSiF <sub>3</sub> <sup>+</sup>  | 0.0133 | HeSiF <sub>2</sub> <sup>2+</sup>               | 0.0170 |
| NeSiF <sub>3</sub> <sup>+</sup>  | 0.0126 | NeSiF <sub>2</sub> <sup>2+</sup>               | 0.0154 |
| ArSiF <sub>3</sub> <sup>+</sup>  | 0.0119 | ArSiF <sub>2</sub> <sup>2+</sup>               | 0.0144 |
| KrSiF <sub>3</sub> <sup>+</sup>  | 0.0120 | KrSiF <sub>2</sub> <sup>2+</sup>               | 0.0145 |
| XeSiF <sub>3</sub> <sup>+</sup>  | 0.0122 | XeSiF <sub>2</sub> <sup>2+</sup>               | 0.0148 |
| RnSiF <sub>3</sub> <sup>+</sup>  | 0.0124 | RnSiF <sub>2</sub> <sup>2+</sup>               | 0.0152 |
| HeSiCl <sub>3</sub> <sup>+</sup> | 0.0111 | FKrSiF <sub>2</sub> <sup>+</sup>               | 0.0202 |
| NeSiCl <sub>3</sub> <sup>+</sup> | 0.0107 | FXeSiF <sub>2</sub> <sup>+</sup>               | 0.0184 |
| ArSiCl <sub>3</sub> <sup>+</sup> | 0.0100 | FRnSiF <sub>2</sub> <sup>+</sup>               | 0.0181 |
